# Supplementary material for: Phase I trial of the single-chain urokinase intrapleural LTI-01 in complicated parapneumonic effusions or empyema
Source: JCI journal article supplement (doi:10.1172/jci.insight.127470), 2019-04-25
Supplement: sd1 [file 1]

# Phase 1 Trial of Intrapleural LTI-01; Single Chain Urokinase in Complicated Parapneumonic Effusions or Empyema

## Supplement

Lutz Beckert<sup>1</sup>, Ben Brockway<sup>2</sup>, Graham Simpson<sup>3</sup>, Anne Marie Southcott<sup>4</sup>, Y.C. Gary Lee<sup>5</sup>, Najib Rahman<sup>6</sup>, Richard W. Light<sup>7</sup>, Steven Shoemaker<sup>8</sup>, John Gillies<sup>9</sup>, Andrey A. Komissarov<sup>10</sup>, Galina Florova<sup>10</sup>, Timothy Ochron<sup>11</sup>, William Bradley<sup>12</sup>, Harrison Ndetan<sup>13</sup>, Karan Singh<sup>13</sup>, Krishna Sarva<sup>10</sup> and Steven Idell<sup>10</sup>

<sup>1</sup>Univeristy of Otago, Christchurch, New Zealand; <sup>2</sup>University of Otago Dunedin School of Medicine, Dunedin, New Zealand; <sup>3</sup>Cairns Hospital, Cairns, Australia; <sup>4</sup>Western Health, Footscray, Australia; <sup>5</sup>Sir Charles Gairdner Hospital, Perth, Australia; <sup>6</sup>Nuffield Department of Medicine, University of Oxford, Oxford, UK; <sup>7</sup>Department of Medicine, Vanderbilt University Medical Center, Nashville, Tennessee, USA; <sup>8</sup>Nicosof LLC, Erie, Colorado, USA; <sup>9</sup>Clinical Network Services (CNS), Auckland, New Zealand; <sup>10</sup>Departments of Cellular and Molecular Biology, <sup>11</sup>Innovation Initiative, <sup>12</sup>Department of Radiation Oncology, <sup>13</sup>Department of Epidemiology and Biostatistics, School of Community and Rural Health, The University of Texas Health Science Center at Tyler, Tyler, Texas, USA.

| Group                                    | LTI-01<br>50,000 IU<br>n=3                                                                                                                       | LTI-01<br>100,000 IU<br>n=3                                                                                                                                                           | LTI-01<br>200,000<br>n=3                                                                                                                        | LTI-01<br>400,000 IU<br>n=3                                                                                                                                                             | LTI-01<br>800,000 IU<br>n=2                                                        |
|------------------------------------------|--------------------------------------------------------------------------------------------------------------------------------------------------|---------------------------------------------------------------------------------------------------------------------------------------------------------------------------------------|-------------------------------------------------------------------------------------------------------------------------------------------------|-----------------------------------------------------------------------------------------------------------------------------------------------------------------------------------------|------------------------------------------------------------------------------------|
| Color/<br>Purulence                      | Cloudy                                                                                                                                           | Brown, Purulent                                                                                                                                                                       | Cloudy                                                                                                                                          | Turbid                                                                                                                                                                                  | No comment                                                                         |
|                                          | Blood Stained                                                                                                                                    | Yellow                                                                                                                                                                                | Purulent                                                                                                                                        | Blood Stained                                                                                                                                                                           | Turbid                                                                             |
|                                          | Turbid                                                                                                                                           | Straw colored                                                                                                                                                                         | Pus                                                                                                                                             | Blood Stained                                                                                                                                                                           | -                                                                                  |
| pH                                       | 7.35*                                                                                                                                            | -                                                                                                                                                                                     | 6.84                                                                                                                                            | 6.91                                                                                                                                                                                    | 7.00                                                                               |
|                                          | 7.2                                                                                                                                              | 7.16                                                                                                                                                                                  | 6.68                                                                                                                                            | 6.76                                                                                                                                                                                    | 7.07                                                                               |
|                                          | 7.2                                                                                                                                              | 7.2                                                                                                                                                                                   | -                                                                                                                                               | 6.5                                                                                                                                                                                     | -                                                                                  |
| Culture                                  | N.G.                                                                                                                                             | <i>Strep. constellatus</i>                                                                                                                                                            | N.G.                                                                                                                                            | <i>E.coli, Klebsiella pneumoniae</i>                                                                                                                                                    | N.G.                                                                               |
|                                          | N.G.                                                                                                                                             | N.G.                                                                                                                                                                                  | <i>Strep intermedius</i>                                                                                                                        | <i>Provitella melaninogenicus, Strep. Oralis, Moraxella catatthalis, Eikenella coordens</i>                                                                                             | N.G.                                                                               |
|                                          | N.G.                                                                                                                                             | N.G.                                                                                                                                                                                  | - (Clotted)                                                                                                                                     | N.G.                                                                                                                                                                                    | -                                                                                  |
| Antibiotic Coverage (Start Day, End Day) | Azithromycin (-7, 1)<br>Amoxicillin (-7, 2)<br>Ceftriaxone (2, 5)<br>Clindamycin (5, 12)                                                         | Amoxicillin (-2, 5)<br>Benzylpenicillin (5, 22)<br>Amoxycillin (22, 51)                                                                                                               | Azithromycin (-4, 1)<br>Amoxicillin (-4, 2)<br>Piperacillin/tazobactam (2, 16)                                                                  | Cefuroxime (-8, -5)<br>Metronidazole (-8, -5)<br>Gentamicin (-7, -6)<br>Meropenem (-5, -1)<br>Ciprofloxacin -1, 37)<br>Meropenem (2, 2)<br>Ceftriaxone (2, 12)<br>Metronidazole (8, 37) | Amoxycillin / Clavulanate (-6, -4)<br>Ceftriaxone (-4, 7)<br>Ciprofloxacin (7, 22) |
|                                          | Ceftriaxone (-14, -6)<br>Metronidazole (-12, -8)<br>Amoxycillin / Clavulanate (-5, -2)<br>Piperacillin/tazobactam (-1, 7)<br>Clindamycin (7, 17) | Amoxycillin / Clavulanate (-3, -3)<br>Amoxycillin (-3, -1)<br>Roxithromycin (-3, -1)<br>Amoxycillin / Clavulanate (-1, 6)<br>Amoxycillin (6, 35)<br>Amoxycillin / clavulanate (6, 35) | Amoxycillin / Clavulanate (-2, -2)<br>Azithromycin (-2, 2)<br>Amoxycillin (-2, 13)<br>Azithromycin (4, 4)<br>Amoxycillin / Clavulanate (14, 42) | Ceftriaxone (-23, 69)<br>Metronidazole 7, 39)                                                                                                                                           | Amoxycillin / clavulanate (-2, 4)<br>Amoxycillin / clavulanate (4, ongoing)        |
|                                          | Doxycycline (-4, -2)<br>Piperacillin/tazobactam (-2,5)<br>Clindamycin (5, 25)                                                                    | Azithromycin (-5, -2)<br>Piperacillin/tazobactam (-5, -2)<br>Clindamycin (-1, 6)<br>Piperacillin/tazobactam (6, 10)                                                                   | Doxycycline (-11, -3)<br>Ceftriaxone (-10, -6)<br>Ceftazidime (-4, -2)<br>Clindamycin (-4, 49)                                                  | Ceftriaxone (-10, -8)<br>Doxycycline (-10, -7)                                                                                                                                          |                                                                                    |

**Table 1. Pleural Fluid Characteristics, Cultures and Antibiotic Use.**

| Group                                       | LTI-01<br>50,000 IU<br>n=3                                                                                                                       | LTI-01<br>100,000 IU<br>n=3                                                                                                                                                           | LTI-01<br>200,000<br>n=3                                                                                                                        | LTI-01<br>400,000 IU<br>n=3                                                                                                                                                             | LTI-01<br>800,000 IU<br>n=2                                                        |
|---------------------------------------------|--------------------------------------------------------------------------------------------------------------------------------------------------|---------------------------------------------------------------------------------------------------------------------------------------------------------------------------------------|-------------------------------------------------------------------------------------------------------------------------------------------------|-----------------------------------------------------------------------------------------------------------------------------------------------------------------------------------------|------------------------------------------------------------------------------------|
| Color/<br>Purulence                         | Cloudy                                                                                                                                           | Brown, Purulent                                                                                                                                                                       | Cloudy                                                                                                                                          | Turbid                                                                                                                                                                                  | No comment                                                                         |
|                                             | Blood Stained                                                                                                                                    | Yellow                                                                                                                                                                                | Purulent                                                                                                                                        | Blood Stained                                                                                                                                                                           | Turbid                                                                             |
|                                             | Turbid                                                                                                                                           | Straw colored                                                                                                                                                                         | Pus                                                                                                                                             | Blood Stained                                                                                                                                                                           | -                                                                                  |
| pH                                          | 7.35*                                                                                                                                            | -                                                                                                                                                                                     | 6.84                                                                                                                                            | 6.91                                                                                                                                                                                    | 7.00                                                                               |
|                                             | 7.2                                                                                                                                              | 7.16                                                                                                                                                                                  | 6.68                                                                                                                                            | 6.76                                                                                                                                                                                    | 7.07                                                                               |
|                                             | 7.2                                                                                                                                              | 7.2                                                                                                                                                                                   | -                                                                                                                                               | 6.5                                                                                                                                                                                     | -                                                                                  |
| Culture                                     | N.G.                                                                                                                                             | <i>Strep. constellatus</i>                                                                                                                                                            | N.G.                                                                                                                                            | <i>E.coli, Klebsiella pneumoniae</i>                                                                                                                                                    | N.G.                                                                               |
|                                             | N.G.                                                                                                                                             | N.G.                                                                                                                                                                                  | <i>Strep intermedius</i>                                                                                                                        | <i>Providella melaninogenicus, Strep. Oralis, Moraxella catatthalis, Eikenella corrodens</i>                                                                                            | N.G.                                                                               |
|                                             | N.G.                                                                                                                                             | N.G.                                                                                                                                                                                  | - (Clotted)                                                                                                                                     | N.G.                                                                                                                                                                                    | -                                                                                  |
| Antibiotic Coverage<br>(Start Day, End Day) | Azithromycin (-7, 1)<br>Amoxicillin (-7, 2)<br>Ceftriaxone (2, 5)<br>Clindamycin (5, 12)                                                         | Amoxicillin (-2, 5)<br>Benzylpenicillin (5, 22)<br>Amoxycillin (22, 51)                                                                                                               | Azithromycin (-4, 1)<br>Amoxicillin (-4, 2)<br>Piperacillin/tazobactam (2, 16)                                                                  | Cefuroxime (-8, -5)<br>Metronidazole (-8, -5)<br>Gentamicin (-7, -6)<br>Meropenem (-5, -1)<br>Ciprofloxacin -1, 37)<br>Meropenem (2, 2)<br>Ceftriaxone (2, 12)<br>Metronidazole (8, 37) | Amoxycillin / Clavulanate (-6, -4)<br>Ceftriaxone (-4, 7)<br>Ciprofloxacin (7, 22) |
|                                             | Ceftriaxone (-14, -6)<br>Metronidazole (-12, -8)<br>Amoxycillin / Clavulanate (-5, -2)<br>Piperacillin/tazobactam (-1, 7)<br>Clindamycin (7, 17) | Amoxycillin / Clavulanate (-3, -3)<br>Amoxycillin (-3, -1)<br>Roxithromycin (-3, -1)<br>Amoxycillin / Clavulanate (-1, 6)<br>Amoxycillin (6, 35)<br>Amoxycillin / clavulanate (6, 35) | Amoxycillin / Clavulanate (-2, -2)<br>Azithromycin (-2, 2)<br>Amoxycillin (-2, 13)<br>Azithromycin (4, 4)<br>Amoxycillin / Clavulanate (14, 42) | Ceftriaxone (-23, 69)<br>Metronidazole 7, 39)                                                                                                                                           | Amoxycillin / clavulanate (-2, 4)<br>Amoxycillin / clavulanate (4, ongoing)        |
|                                             | Doxycycline (-4, -2)<br>Piperacillin/tazobactam (-2,5)<br>Clindamycin (5, 25)                                                                    | Azithromycin (-5, -2)<br>Piperacillin/tazobactam (-5, -2)<br>Clindamycin (-1, 6)<br>Piperacillin/tazobactam (6, 10)                                                                   | Doxycycline (-11, -3)<br>Ceftriaxone (-10, -6)<br>Ceftazidime (-4, -2)<br>Clindamycin (-4, 49)                                                  | Ceftriaxone (-10, -8)<br>Doxycycline (-10, -7)                                                                                                                                          |                                                                                    |

|  |  |                      |  |                                                                                             |  |
|--|--|----------------------|--|---------------------------------------------------------------------------------------------|--|
|  |  | Clindamycin (10, 35) |  | Amoxicillin / Clavulanate (-7, -6)<br>Piperillin/ Tazobactam (-7, 4)<br>Clindamycin (4, 37) |  |
|--|--|----------------------|--|---------------------------------------------------------------------------------------------|--|

**Legend:** Start day and end day for antibiotic use refer to Study Day (first day of LTI-01 administration was Study Day 1). Minus signs indicate antibiotic use prior to day 1. Brackets indicate initiation and final day of administration of the indicated antibiotic agent. If an antibiotic is listed twice for the same subject the dose or route of administration was changed. N.G.: No growth on aerobic or anaerobic PF cultures. \* The subject had a PF pH of exactly 7.2 at screening. The subject was enrolled into the study as all other entry criteria were met and no additional safety risk of enrollment was foreseen. The patient entered the study under a protocol exception waiver.

**Table 2: Study Schedule**

| STUDY DAY ►                                                       | SCREEN<br>Day -1 | Day 1-2                       |                        |                | Day 2-3                       |                        |    | Day 3-4                       |                        |                 | Days<br>4-7     | Days 7-28<br>or<br>Hospital<br>Discharge |
|-------------------------------------------------------------------|------------------|-------------------------------|------------------------|----------------|-------------------------------|------------------------|----|-------------------------------|------------------------|-----------------|-----------------|------------------------------------------|
|                                                                   |                  | Within<br>3 h<br>pre-<br>dose | Hours<br>post-<br>dose |                | Within<br>3 h<br>pre-<br>dose | Hours<br>post-<br>dose |    | Within<br>3 h<br>pre-<br>dose | Hours<br>post-<br>dose |                 |                 |                                          |
| 3                                                                 | 23               |                               | 3                      | 23             |                               | 3                      | 23 |                               |                        |                 |                 |                                          |
| EVENT ▼                                                           |                  |                               |                        |                |                               |                        |    |                               |                        |                 |                 |                                          |
| Informed Consent                                                  | X                |                               |                        |                |                               |                        |    |                               |                        |                 |                 |                                          |
| Medical/medication History                                        | X                |                               |                        |                |                               |                        |    |                               |                        |                 |                 |                                          |
| Inclusion/Exclusion Criteria                                      | X                |                               |                        |                |                               |                        |    |                               |                        |                 |                 |                                          |
| Confirmation of Eligibility                                       | X                | X <sup>2</sup>                |                        |                |                               |                        |    |                               |                        |                 |                 |                                          |
| Demographics (incl. height and weight)                            | X                |                               |                        |                |                               |                        |    |                               |                        |                 |                 |                                          |
| Physical Examination                                              | X                |                               |                        |                |                               |                        |    |                               | X                      |                 |                 |                                          |
| Vital Signs (pre-dose and 3, 6, 12, 18 hours post-dose)           | X                | X                             | X                      | X <sup>6</sup> | X                             | X <sup>6</sup>         | X  | X                             | X <sup>*</sup>         |                 |                 |                                          |
| Serum Pregnancy Test (WOCBP)                                      | X                |                               |                        |                |                               |                        |    |                               |                        |                 |                 |                                          |
| Chest X-ray                                                       | X                |                               |                        |                |                               |                        |    |                               | X                      |                 |                 |                                          |
| Chest CT (preferably high resolution)                             | X                |                               |                        |                |                               |                        |    |                               | X                      |                 |                 |                                          |
| Chest Ultrasonography                                             | X                |                               | X                      |                | X                             |                        |    | X                             |                        |                 |                 |                                          |
| Tube thoracostomy under CT guidance and initiation of antibiotics | X                |                               |                        |                |                               |                        |    |                               |                        |                 |                 |                                          |
| Review of Blood and PF Screening                                  | X <sup>5</sup>   | X                             |                        |                |                               |                        |    |                               |                        |                 |                 |                                          |
| Dosing                                                            |                  | X                             |                        | X <sup>3</sup> |                               | X <sup>3</sup>         |    |                               |                        |                 |                 |                                          |
| Clamp Chest Tube <sup>1</sup>                                     |                  | X                             |                        | X              |                               | X                      |    |                               |                        |                 |                 |                                          |
| Blood sample for hematology (local) <sup>1</sup>                  | X                | X                             | X                      | X <sup>6</sup> | X                             | X <sup>6</sup>         | X  | X                             | X <sup>*</sup>         |                 |                 |                                          |
| Blood sample for central lab <sup>1</sup>                         |                  | X                             | X                      | X <sup>6</sup> | X                             | X <sup>6</sup>         | X  | X                             |                        |                 |                 |                                          |
| Blood sample for ADA <sup>11</sup>                                |                  | X                             |                        |                |                               |                        |    |                               |                        |                 | X               |                                          |
| Blood chemistries                                                 | X                | X                             |                        | X <sup>6</sup> |                               | X <sup>6</sup>         |    | X                             | X <sup>*</sup>         |                 |                 |                                          |
| CRP (blood)                                                       |                  | X                             |                        | X <sup>6</sup> |                               | X <sup>6</sup>         |    | X                             | X <sup>*</sup>         |                 | X <sup>*</sup>  |                                          |
| PF collected <sup>4</sup> (half of sample for central lab)        |                  | X                             | X                      | X              | X                             | X                      | X  | X                             | X                      |                 |                 |                                          |
| Assessment of PF drainage                                         | X                | X <sup>3</sup>                |                        | X <sup>3</sup> |                               | X <sup>3</sup>         |    |                               | X                      |                 |                 |                                          |
| Adverse Events (post-enrollment)                                  |                  | X                             | X                      | X              | X                             | X                      | X  | X                             | X                      | X <sup>8</sup>  |                 |                                          |
| SAE (post-enrollment)                                             | X                | X                             | X                      | X              | X                             | X                      | X  | X                             | X                      | X               | X <sup>9</sup>  |                                          |
| Concomitant Medications                                           | X                | X                             | X                      | X              | X                             | X                      | X  | X                             | X                      | X <sup>10</sup> | X <sup>10</sup> |                                          |

**Legend: Study Design and Schedule of Assessments**

\*As available in medical record.

<sup>1</sup> Complete blood count with differential and platelets, coagulation tests (i.e. PT/PTT, fibrinogen) done locally; half of sample processed for PK/PD at UTHSCT on days when required

<sup>2</sup> Reassessment of PT/PTT, fibrinogen and platelets

<sup>3</sup> PF drainage volume recorded daily once the subject was enrolled. PF volume from the chest tube also recorded during the period of time in between enrollment and the first dose. The total amount of pleural drainage from study entry to completion was totaled from these assessments. Second and third LTI-01 doses were not given if there was complete resolution of pleural process after the prior dose.

<sup>4</sup> PF cell count, hematocrit and protein performed at local lab; half of sample processed for PK/PD at UTHSCT

<sup>5</sup> PF assessment of purulency, Gram stain, culture, pH and volume; blood culture results

<sup>6</sup> 23 hours post-dose sample served as pre-dose sample for next dose and was performed within 3 hours pre-dose

<sup>8</sup> Grade 3 and 4 AEs, and fever

<sup>9</sup> Through Day 28 or hospital discharge, whichever occurred first.

<sup>10</sup> Total days of antibiotics

<sup>11</sup> Blood sample for ADA screening at Day 28 or hospital discharge, whichever occurred first.

**Table 3: Overall Summary of Adverse Events**

| Adverse Event Summary                         | LTI-01<br>50,000 IU<br>(N=3) | LTI-01<br>100,000 IU<br>(N=3) | LTI-01<br>200,000 IU<br>(N=3) | LTI-01<br>400,000 IU<br>(N=3) | LTI-01<br>800,000 IU<br>(N=2) | All<br>LTI-01<br>(N=14) |
|-----------------------------------------------|------------------------------|-------------------------------|-------------------------------|-------------------------------|-------------------------------|-------------------------|
| <b>Number of subjects (%) Number of TEAEs</b> |                              |                               |                               |                               |                               |                         |
| All TEAEs                                     | 2 (66.7%) <sup>10</sup>      | 2 (66.7%) <sup>6</sup>        | 2 (66.7%) <sup>5</sup>        | 1 (33.3%) <sup>1</sup>        | 0                             | 7 (50.0%) <sup>22</sup> |
| Severe TEAEs                                  | 1 (33.3%) <sup>2</sup>       | 0                             | 0                             | 1 (33.3%) <sup>1</sup>        | 0                             | 2 (14.3%) <sup>3</sup>  |
| Treatment-related TEAEs                       | 0                            | 0                             | 0                             | 0                             | 0                             | 0                       |
| SAEs                                          | 1 (33.3%) <sup>1</sup>       | 0                             | 0                             | 1 (33.3%) <sup>1</sup>        | 0                             | 2 (14.3%) <sup>2</sup>  |
| TEAEs leading to study drug withdrawal        | 0                            | 2 (66.7%) <sup>2</sup>        | 1 (33.3%) <sup>1</sup>        | 0                             | 0                             | 3 (21.4%) <sup>3</sup>  |
| TEAEs leading to discontinuation from study   | 0                            | 0                             | 0                             | 0                             | 0                             | 0                       |
| Life threatening TEAEs                        | 0                            | 0                             | 0                             | 0                             | 0                             | 0                       |
| TEAEs leading to death                        | 1 (33.3%) <sup>1</sup>       | 0                             | 0                             | 0                             | 0                             | 1 (7.1%) <sup>1</sup>   |

**Section 1. Protocol Deviations.** A total of 116 protocol deviations in all 14 subjects occurred during the study. No deviation led to exclusion of subject data from an analysis population. Two described below required a protocol waiver as did dosing of two patients at one time, waiver date March 21, 2018.

Subject 202-1001 (50,000 IU) did not meet Inclusion Criterion #3 at the time of Screening (listed as *PF with a pH  $\leq$ 7.2*, but with a protocol inconsistency elsewhere requiring subjects to have a PF pH of  $<$ 7.2). The subject had a PF pH of exactly 7.2 at Screening. The subject was enrolled into the study as all other entry criteria were met and no additional safety risk of enrolment was foreseen. A protocol exception waiver request form for Subject 202-1001 was obtained. Following the inclusion of the subject, a protocol clarification memo was issued to confirm the intended inclusion criterion of PF pH  $\leq$ 7.2. The Inclusion criterion failure for Subject 202-1001 is not included in, owing to the protocol clarification.

One (1) subject met Exclusion Criterion #12 (*Estimated creatinine clearance [ $CL_{CR}$ ]  $<$ 30 mL/minute or eGFR  $<$ 30 mL/minute*) at Screening and Day 1. Creatinine and GFR measurement readings for Subject 102-1007 (800,000 IU) at Screening and Day 1 (pre-dose) were 21 and 23 ml/min. Screening and Day 1 creatinine and GFR values preceded study drug administration, were considered to be clinically significant and related to the subject's underlying medical condition.

**Section 2. Individual Patient Biochemical Findings and Outcomes.** We further examined the findings in the two patients who died remote to their LTI-01 IPFT. Both had relatively elevated PF levels of PAI-1 during the LTI-01 treatment period (Supplement). One; 102-1006, who received 3 doses of 400,000 IU LTI-01 IPFT, developed a right lower lobe cavity associated with ipsilateral pneumonia and CPE. This patient also had right hilar and subcarinal adenopathy causing narrowing of the bronchus intermedius and died at d86, 5 days after completion of treatment and had persistently increased PF PAI-1 in the 4  $\mu$ g/ml range in post-dose PFs at days 2 and 3 despite a relative reduction of pleural density of 31 % at d4. The patient with empyema and concomitant metastatic head and neck cancer; 202-1001, received 3 doses of 50,000 IU LTI-01 IPFT and had a two order of magnitude increment of PF uPA to about 15  $\mu$ g/ml 3h post-treatment on day 1, but PAI-1 levels increased to almost 4  $\mu$ g/ml in PF by day 2 pre-dose concurrent with a loculated effusion failed to resolve by CXR at d4.

Of the four patients treated with follow-up tPA or tPA/DNase after LTI-01 IPFT, subject 202-1003 did not receive the third dose of 100,000 IU LTI-01 IPFT because an elevated PT. This patient developed increased white cell counts; ( $+12.6 \times 10^9/L$ ) and neutrophil counts ( $+13.5 \times 10^9/L$ ) at day 6, and was treated with tPA/DNase between days 5 and 8. CRP levels fell between days 2 and 5 during LTI-01 IPFT and at the beginning of tPA/DNase and were unavailable at days 5-8. Interestingly, this patient's PF uPA increased with decreased PF PAI-1 during the LTI-01 treatment phase (Figure 7 A and B). Subject 202-1002 had 2 doses of 50,000 IU of LTI-01 IPFT and had after which chest ultrasound showing no additional fluid to drain so that the third dose was not administered. The CRP was falling but remained elevated at 230 mg/DL at d3, so that tPA, then tPA/DNase IPFT was given at days 4 and 5 via a newly placed chest tube into a pleural collection that was identified at that time. In this patient, uPA antigen post-dosing of LTI-01 IPFT at day 2 did not increase versus predose levels (Fig 7A) and levels of PF PAI-1 remained elevated, suggesting that delivery of the second dose of LTI-01 could have been inadequate or incomplete. In two other patients; 202-1004 and 202-1005, treated with tPA/DNase after receiving 3 doses of either 200,000 or 400,000 IU respectively, levels of PF uPA were among the highest noted 3h post LTI-01 dosing at which point PAI-1 levels were markedly decreased. In the patient receiving 200,000 IU, CRP levels were lower than in any other patient, falling during LTI-01 IPFT and white/PMN counts were falling. The treating physician chose to add tPA/DNase because of residual empyema. In the patient receiving 400,000 IU LTI-01, CRP initially fell during LTI-01 IPFT versus baseline, but rose at day 4 despite normal white and neutrophil counts and the patient received tPA/DNase to provide additional assurance that this patient would be ready to travel shortly after hospitalization.

Of the four remaining subjects, two were in the 100,000 IU group, two in the 200,000 IU group. These patients all had relative reductions in pleural density of 15, 83, 71 and 37 percent, respectively with no switch to alternative IPFT or surgical intervention. Both patients in the 100,000 IU group had clear increments of PF uPA post-dosing (Figure 7A) and relatively low;  $<2 \mu\text{g/ml}$ ; subject 102-1001 or relatively high initial; about 4 mg/ml, levels of PF PAI-1, that fell to about  $2 \mu\text{g/ml}$  after LTI-01 IPFT (subject 103-1001, Figure 7B). Subject 103-1001 received only two doses of LTI-01 as the chest tube migrated and recovered without further intervention beyond customary care. In the remaining two subjects treated with 200,000 IU/ml, post-treatment (3h) PF uPA was about 100 mg/ml and PF PAI-1 fell from about  $3.75 \mu\text{g/ml}$ ; subject 102-1003 to about  $2 \mu\text{g/ml}$  or remained within a range of about  $2 \mu\text{g/ml}$  throughout the treatment period (subject 102-1004, Figure 7B). Subject 102-1004 required only two treatments of LTI-01 IPFT as the patient had a chest wall hematoma felt to be due to chest tube insertion. This patient was clinically improving. The PF was felt to be adequately drained and the patient recovered.



**Figure S1: Individual Changes In Hemoglobin Over Time (All Subjects)**

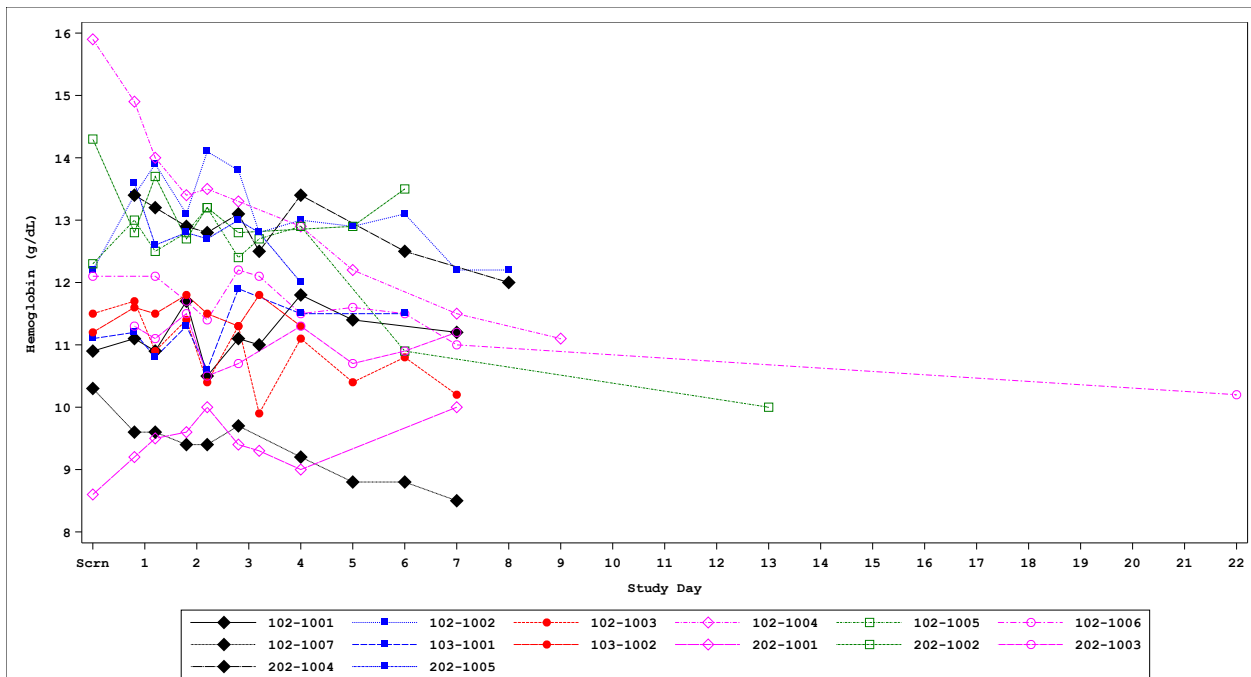

**Legend.** Hemoglobin determinations were all measured at the clinical laboratories of the participating sites.

**Figure S2. Individual Changes in Total White Blood Cell Counts (All Patients).Legend.**

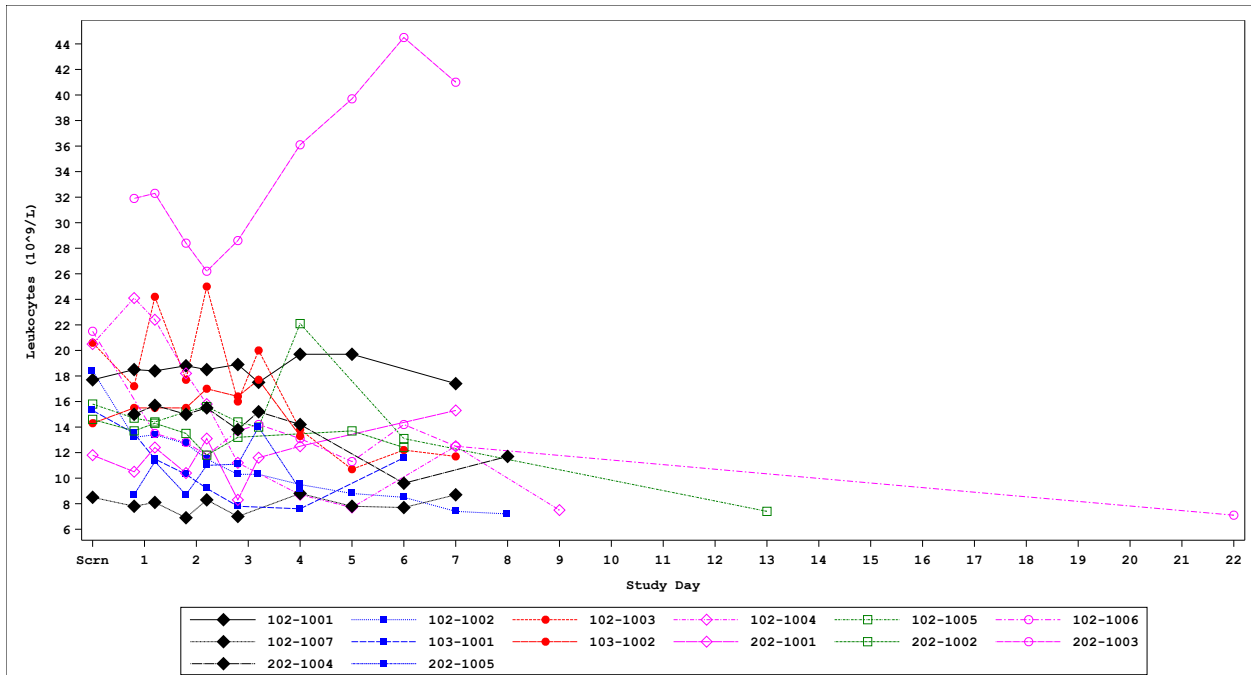

**Legend.** Total leucocytes were measured as part of the complete blood cell determinations (CBCs) measured by the participating clinical laboratories.

**Figure S3. Individual Changes in Blood Neutrophil (All Patients).**

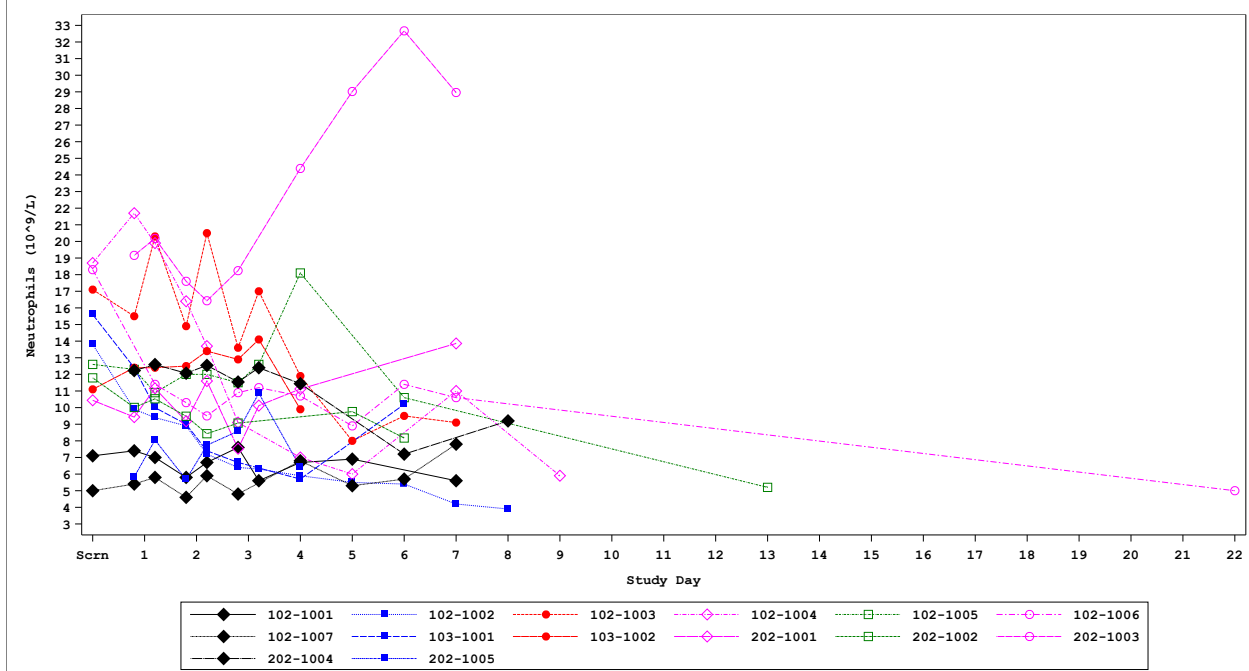

**Legend.** The blood neutrophil counts were determined by the clinical laboratories of the participating institutions as part of the CBC determinations at each interval.

**Figure S4. Individual Changes in Plasma Fibrinogen (All Patients).**

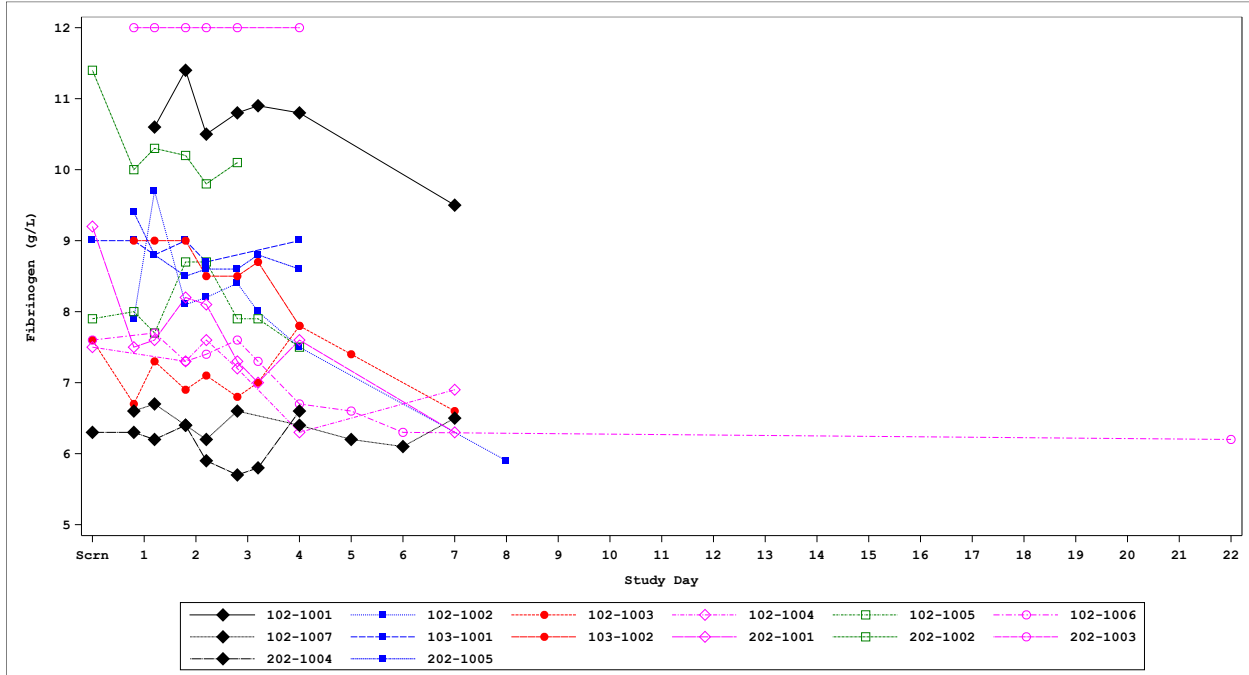

**Legend.** Plasma fibrinogen levels were determined by the clinical laboratories of the participating institutions.

**Figure S5. Individual Changes In Plasma C-Reactive Protein (CRP, All Patients).**

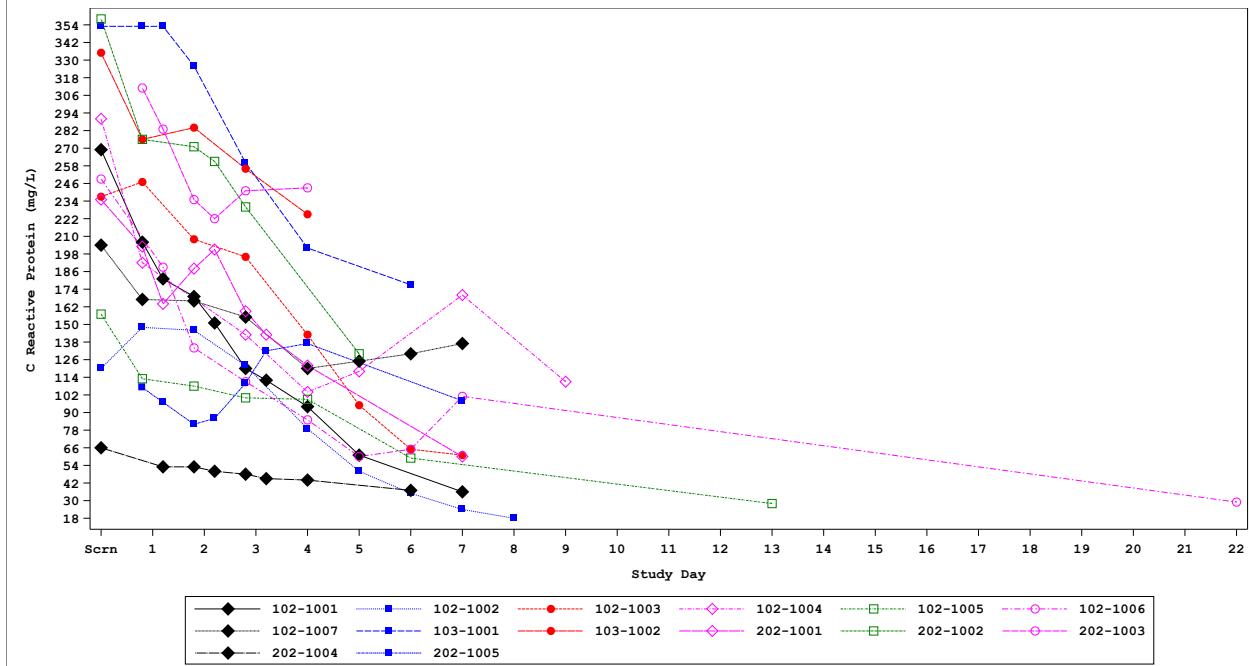

**Legend.** Plasma CRP levels were determined by the clinical laboratories of the participating institutions.

**Table 4. Pharmacokinetic (PK) and Pharmacodynamic (PD in PFs) Information (All Available Samples, All Patients).**

PK Listing 1 (Plasma PK)

| Analyte   | Matrix | Subject group | Treatment Description (units) | Subject  | Day   | Hour      | Concentration pg/mL | Comment |
|-----------|--------|---------------|-------------------------------|----------|-------|-----------|---------------------|---------|
| Urokinase | Plasma | A             | 50,000                        | 102-1001 | Day1  | pre       | 515                 |         |
| Urokinase | Plasma | A             | 50,000                        | 102-1001 | Day1  | post (3h) | 452                 |         |
| Urokinase | Plasma | A             | 50,000                        | 102-1001 | Day 2 | pre       | 594                 |         |
| Urokinase | Plasma | A             | 50,000                        | 102-1001 | Day 2 | post (3h) | 547                 |         |
| Urokinase | Plasma | A             | 50,000                        | 102-1001 | Day 3 | pre       | 535                 |         |
| Urokinase | Plasma | A             | 50,000                        | 102-1001 | Day 3 | post (3h) | 594                 |         |
| Urokinase | Plasma | A             | 50,000                        | 102-1001 | Day4  |           | 922                 |         |
| Urokinase | Plasma | B             | 100,000                       | 102-1002 | Day1  | pre       | 599                 |         |
| Urokinase | Plasma | B             | 100,000                       | 102-1002 | Day1  | post (3h) | 671                 |         |
| Urokinase | Plasma | B             | 100,000                       | 102-1002 | Day 2 | pre       | 618                 |         |
| Urokinase | Plasma | B             | 100,000                       | 102-1002 | Day 2 | post (3h) | 602                 |         |
| Urokinase | Plasma | B             | 100,000                       | 102-1002 | Day 3 | pre       | 674                 |         |
| Urokinase | Plasma | B             | 100,000                       | 102-1002 | Day 3 | post (3h) | 579                 |         |
| Urokinase | Plasma | B             | 100,000                       | 102-1002 | Day4  |           | 955                 |         |

|           |        |   |         |          |       |           |     |           |
|-----------|--------|---|---------|----------|-------|-----------|-----|-----------|
| Urokinase | Plasma | C | 200,000 | 102-1003 | Day1  | pre       | 493 |           |
| Urokinase | Plasma | C | 200,000 | 102-1003 | Day1  | post (3h) | 517 |           |
| Urokinase | Plasma | C | 200,000 | 102-1003 | Day 2 | pre       | 386 |           |
| Urokinase | Plasma | C | 200,000 | 102-1003 | Day 2 | post (3h) | 612 |           |
| Urokinase | Plasma | C | 200,000 | 102-1003 | Day 3 | pre       | 399 |           |
| Urokinase | Plasma | C | 200,000 | 102-1003 | Day 3 | post (3h) | 465 |           |
| Urokinase | Plasma | C | 200,000 | 102-1003 | Day4  |           | 518 |           |
| Urokinase | Plasma | C | 200,000 | 102-1004 | Day1  | pre       | 422 |           |
| Urokinase | Plasma | C | 200,000 | 102-1004 | Day1  | post (3h) | 321 |           |
| Urokinase | Plasma | C | 200,000 | 102-1004 | Day 2 | pre       | 366 |           |
| Urokinase | Plasma | C | 200,000 | 102-1004 | Day 2 | post (3h) | 376 |           |
| Urokinase | Plasma | C | 200,000 | 102-1004 | Day 3 | pre       | 434 |           |
| Urokinase | Plasma | C | 200,000 | 102-1004 | Day 3 | post (3h) |     | No Sample |
| Urokinase | Plasma | C | 200,000 | 102-1004 | Day4  |           | 666 |           |
| Urokinase | Plasma | D | 400,000 | 102-1005 | Day1  | pre       | 475 |           |
| Urokinase | Plasma | D | 400,000 | 102-1005 | Day1  | post (3h) | 391 |           |
| Urokinase | Plasma | D | 400,000 | 102-1005 | Day 2 | pre       | 450 |           |
| Urokinase | Plasma | D | 400,000 | 102-1005 | Day 2 | post (3h) | 544 |           |

|           |        |   |         |          |       |           |      |           |
|-----------|--------|---|---------|----------|-------|-----------|------|-----------|
| Urokinase | Plasma | D | 400,000 | 102-1005 | Day 3 | pre       | 467  |           |
| Urokinase | Plasma | D | 400,000 | 102-1005 | Day 3 | post (3h) | 577  |           |
| Urokinase | Plasma | D | 400,000 | 102-1005 | Day4  |           | 834  |           |
| Urokinase | Plasma | D | 400,000 | 102-1006 | Day1  | pre       | 730  |           |
| Urokinase | Plasma | D | 400,000 | 102-1006 | Day1  | post (3h) | 782  |           |
| Urokinase | Plasma | D | 400,000 | 102-1006 | Day 2 | pre       | 754  |           |
| Urokinase | Plasma | D | 400,000 | 102-1006 | Day 2 | post (3h) | 829  |           |
| Urokinase | Plasma | D | 400,000 | 102-1006 | Day 3 | pre       | 762  |           |
| Urokinase | Plasma | D | 400,000 | 102-1006 | Day 3 | post (3h) | 909  |           |
| Urokinase | Plasma | D | 400,000 | 102-1006 | Day4  |           | 1152 |           |
| Urokinase | Plasma | E | 800,000 | 102-1007 | Day1  | pre       | 743  |           |
| Urokinase | Plasma | E | 800,000 | 102-1007 | Day1  | post (3h) | 1446 |           |
| Urokinase | Plasma | E | 800,000 | 102-1007 | Day 2 | pre       | 785  |           |
| Urokinase | Plasma | E | 800,000 | 102-1007 | Day 2 | post (3h) | 1085 |           |
| Urokinase | Plasma | E | 800,000 | 102-1007 | Day 3 | pre       | 788  |           |
| Urokinase | Plasma | E | 800,000 | 102-1007 | Day 3 | post (3h) |      | No Sample |
| Urokinase | Plasma | E | 800,000 | 102-1007 | Day4  |           | 1069 |           |
| Urokinase | Plasma | A | 50,000  | 202-1001 | Day1  | pre       | 732  |           |

|           |        |   |         |          |       |           |      |           |
|-----------|--------|---|---------|----------|-------|-----------|------|-----------|
| Urokinase | Plasma | A | 50,000  | 202-1001 | Day1  | post (3h) | 561  |           |
| Urokinase | Plasma | A | 50,000  | 202-1001 | Day 2 | pre       | 563  |           |
| Urokinase | Plasma | A | 50,000  | 202-1001 | Day 2 | post (3h) | 677  |           |
| Urokinase | Plasma | A | 50,000  | 202-1001 | Day 3 | pre       | 741  | Repeated  |
| Urokinase | Plasma | A | 50,000  | 202-1001 | Day 3 | post (3h) | 770  |           |
| Urokinase | Plasma | A | 50,000  | 202-1001 | Day4  |           | 632  |           |
| Urokinase | Plasma | A | 50,000  | 202-1002 | Day1  | pre       | 457  | Repeated  |
| Urokinase | Plasma | A | 50,000  | 202-1002 | Day1  | post (3h) | 517  | Repeated  |
| Urokinase | Plasma | A | 50,000  | 202-1002 | Day 2 | pre       | 432  | Repeated  |
| Urokinase | Plasma | A | 50,000  | 202-1002 | Day 2 | post (3h) | 513  | Repeated  |
| Urokinase | Plasma | A | 50,000  | 202-1002 | Day 3 | pre       | 539  | Repeated  |
| Urokinase | Plasma | A | 50,000  | 202-1002 | Day 3 | post (3h) |      | No Sample |
| Urokinase | Plasma | A | 50,000  | 202-1002 | Day4  |           |      | No Sample |
| Urokinase | Plasma | B | 100,000 | 202-1003 | Day1  | pre       | 1822 |           |
| Urokinase | Plasma | B | 100,000 | 202-1003 | Day1  | post (3h) | 2141 |           |
| Urokinase | Plasma | B | 100,000 | 202-1003 | Day 2 | pre       | 1786 |           |
| Urokinase | Plasma | B | 100,000 | 202-1003 | Day 2 | post (3h) | 1998 |           |
| Urokinase | Plasma | B | 100,000 | 202-1003 | Day 3 | pre       | 2199 |           |



|           |        |   |         |          |       |           |     |           |
|-----------|--------|---|---------|----------|-------|-----------|-----|-----------|
| Urokinase | Plasma | B | 100,000 | 202-1003 | Day 3 | post (3h) |     | No Sample |
| Urokinase | Plasma | B | 100,000 | 202-1003 | Day 4 |           |     | No Sample |
| Urokinase | Plasma | C | 200,000 | 202-1004 | Day1  | Pre       | 621 | Repeated  |
| Urokinase | Plasma | C | 200,000 | 202-1004 | Day1  | Post (3h) | 640 | Repeated  |
| Urokinase | Plasma | C | 200,000 | 202-1004 | Day2  | Pre       | 657 | Repeated  |
| Urokinase | Plasma | C | 200,000 | 202-1004 | Day2  | Post (3h) | 664 | Repeated  |
| Urokinase | Plasma | C | 200,000 | 202-1004 | Day3  | Pre       | 592 | Repeated  |
| Urokinase | Plasma | C | 200,000 | 202-1004 | Day3  | Post (3h) | 631 |           |
| Urokinase | Plasma | C | 200,000 | 202-1004 | Day4  |           | 580 | Repeated  |
| Urokinase | Plasma | D | 400,000 | 202-1005 | Day1  | pre       | 562 | Repeated  |
| Urokinase | Plasma | D | 400,000 | 202-1005 | Day1  | post (3h) | 572 |           |
| Urokinase | Plasma | D | 400,000 | 202-1005 | Day 2 | pre       | 504 |           |
| Urokinase | Plasma | D | 400,000 | 202-1005 | Day 2 | post (3h) | 604 | Repeated  |
| Urokinase | Plasma | D | 400,000 | 202-1005 | Day 3 | pre       | 796 | Repeated  |
| Urokinase | Plasma | D | 400,000 | 202-1005 | Day 3 | post (3h) | 686 |           |
| Urokinase | Plasma | D | 400,000 | 202-1005 | Day 4 |           | 559 | Repeated  |
| Urokinase | Plasma | B | 100,000 | 103-1001 | Day1  | pre       | 434 | Repeated  |
| Urokinase | Plasma | B | 100,000 | 103-1001 | Day1  | post (3h) | 390 | Repeated  |

|           |        |   |         |          |       |           |     |           |
|-----------|--------|---|---------|----------|-------|-----------|-----|-----------|
| Urokinase | Plasma | B | 100,000 | 103-1001 | Day 2 | pre       | 414 | Repeated  |
| Urokinase | Plasma | B | 100,000 | 103-1001 | Day 2 | post (3h) | 404 | Repeated  |
| Urokinase | Plasma | B | 100,000 | 103-1001 | Day 3 | pre       | 532 | Repeated  |
| Urokinase | Plasma | B | 100,000 | 103-1001 | Day 3 | post (3h) |     | No Sample |
| Urokinase | Plasma | B | 100,000 | 103-1001 | Day4  |           | 493 | Repeated  |
| Urokinase | Plasma | E | 800,000 | 103-1002 | Day1  | pre       | 554 |           |
| Urokinase | Plasma | E | 800,000 | 103-1002 | Day1  | post (3h) | 554 |           |
| Urokinase | Plasma | E | 800,000 | 103-1002 | Day 2 | pre       | 240 |           |
| Urokinase | Plasma | E | 800,000 | 103-1002 | Day 2 | post (3h) | 599 |           |
| Urokinase | Plasma | E | 800,000 | 103-1002 | Day 3 | pre       | 605 |           |
| Urokinase | Plasma | E | 800,000 | 103-1002 | Day 3 | post (3h) | 637 |           |
| Urokinase | Plasma | E | 800,000 | 103-1002 | Day4  |           | 507 |           |

### PK Listing (PF PK)

| Analyte   | Matrix        | Subject Group | LTI-03 Dose | Subject ID | Day   | Hour      | Concentration (pg/ml) | Comment |
|-----------|---------------|---------------|-------------|------------|-------|-----------|-----------------------|---------|
| Urokinase | Pleural Fluid | A             | 50,000      | 102-1001   | Day1  | pre       | 1015                  |         |
| Urokinase | Pleural Fluid | A             | 50,000      | 102-1001   | Day1  | post (3h) | 744741                |         |
| Urokinase | Pleural Fluid | A             | 50,000      | 102-1001   | Day 2 | pre       | 1002                  |         |

|           |               |   |         |          |       |           |         |           |
|-----------|---------------|---|---------|----------|-------|-----------|---------|-----------|
| Urokinase | Pleural Fluid | A | 50,000  | 102-1001 | Day 2 | post (3h) | 191217  |           |
| Urokinase | Pleural Fluid | A | 50,000  | 102-1001 | Day 3 | pre       |         | No sample |
| Urokinase | Pleural Fluid | A | 50,000  | 102-1001 | Day 3 | post (3h) | 154610  |           |
| Urokinase | Pleural Fluid | A | 50,000  | 102-1001 | Day4  |           | 2156    |           |
| Urokinase | Pleural Fluid | B | 100,000 | 102-1002 | Day1  | pre       | 21168   |           |
| Urokinase | Pleural Fluid | B | 100,000 | 102-1002 | Day1  | post (3h) | 1150617 |           |
| Urokinase | Pleural Fluid | B | 100,000 | 102-1002 | Day 2 | pre       | 27144   |           |
| Urokinase | Pleural Fluid | B | 100,000 | 102-1002 | Day 2 | post (3h) | 417340  |           |
| Urokinase | Pleural Fluid | B | 100,000 | 102-1002 | Day 3 | pre       |         | No sample |
| Urokinase | Pleural Fluid | B | 100,000 | 102-1002 | Day 3 | post (3h) | 823621  |           |
| Urokinase | Pleural Fluid | B | 100,000 | 102-1002 | Day4  |           |         | No sample |
| Urokinase | Pleural Fluid | C | 200,000 | 102-1003 | Day1  | pre       | 2157    |           |
| Urokinase | Pleural Fluid | C | 200,000 | 102-1003 | Day1  | post (3h) | 2014684 |           |
| Urokinase | Pleural Fluid | C | 200,000 | 102-1003 | Day 2 | pre       |         | No sample |
| Urokinase | Pleural Fluid | C | 200,000 | 102-1003 | Day 2 | post (3h) | 1305630 |           |
| Urokinase | Pleural Fluid | C | 200,000 | 102-1003 | Day 4 |           |         | No sample |
| Urokinase | Pleural Fluid | C | 200,000 | 102-1004 | Day1  | pre       | 20159   |           |
| Urokinase | Pleural Fluid | C | 200,000 | 102-1004 | Day1  | post (3h) | 1606368 |           |

|           |               |   |         |          |       |           |         |           |
|-----------|---------------|---|---------|----------|-------|-----------|---------|-----------|
| Urokinase | Pleural Fluid | C | 200,000 | 102-1004 | Day 2 | pre       | 84862   |           |
| Urokinase | Pleural Fluid | C | 200,000 | 102-1004 | Day 2 | post (3h) | 2302378 |           |
| Urokinase | Pleural Fluid | C | 200,000 | 102-1004 | Day 3 | pre       | 36156   |           |
| Urokinase | Pleural Fluid | C | 200,000 | 102-1004 | Day 3 | post (3h) |         | No sample |
| Urokinase | Pleural Fluid | C | 200,000 | 102-1004 | Day4  |           | 10748   |           |
| Urokinase | Pleural Fluid | D | 400,000 | 102-1005 | Day1  | pre       | 17860   |           |
| Urokinase | Pleural Fluid | D | 400,000 | 102-1005 | Day1  | post (3h) | 2308244 |           |
| Urokinase | Pleural Fluid | D | 400,000 | 102-1005 | Day 2 | pre       |         | No sample |
| Urokinase | Pleural Fluid | D | 400,000 | 102-1005 | Day 2 | post (3h) | 4356460 |           |
| Urokinase | Pleural Fluid | D | 400,000 | 102-1005 | Day 3 | pre       |         | No sample |
| Urokinase | Pleural Fluid | D | 400,000 | 102-1005 | Day 3 | post (3h) | 6136156 |           |
| Urokinase | Pleural Fluid | D | 400,000 | 102-1005 | Day4  |           |         | No sample |
| Urokinase | Pleural Fluid | D | 400,000 | 102-1006 | Day1  | pre       |         | No sample |
| Urokinase | Pleural Fluid | D | 400,000 | 102-1006 | Day1  | post (3h) | 234980  |           |
| Urokinase | Pleural Fluid | D | 400,000 | 102-1006 | Day 2 | pre       |         | No sample |
| Urokinase | Pleural Fluid | D | 400,000 | 102-1006 | Day 2 | post (3h) | 1972144 |           |
| Urokinase | Pleural Fluid | D | 400,000 | 102-1006 | Day 3 | pre       |         | No sample |
| Urokinase | Pleural Fluid | D | 400,000 | 102-1006 | Day 3 | post (3h) | 3274536 |           |

|           |               |   |         |          |       |           |         |           |
|-----------|---------------|---|---------|----------|-------|-----------|---------|-----------|
| Urokinase | Pleural Fluid | D | 400,000 | 102-1006 | Day4  |           |         | No sample |
| Urokinase | Pleural Fluid | E | 800,000 | 102-1007 | Day1  | pre       |         | No sample |
| Urokinase | Pleural Fluid | E | 800,000 | 102-1007 | Day1  | post (3h) | 1447792 |           |
| Urokinase | Pleural Fluid | E | 800,000 | 102-1007 | Day 2 | pre       |         | No sample |
| Urokinase | Pleural Fluid | E | 800,000 | 102-1007 | Day 2 | post (3h) | 1461872 |           |
| Urokinase | Pleural Fluid | E | 800,000 | 102-1007 | Day 3 | pre       |         | No sample |
| Urokinase | Pleural Fluid | E | 800,000 | 102-1007 | Day 3 | post (3h) |         | No sample |
| Urokinase | Pleural Fluid | E | 800,000 | 102-1007 | Day4  |           |         | No sample |
| Urokinase | Pleural Fluid | A | 50,000  | 202-1001 | Day1  | pre       | 5704    |           |
| Urokinase | Pleural Fluid | A | 50,000  | 202-1001 | Day1  | post (3h) | 283226  |           |
| Urokinase | Pleural Fluid | A | 50,000  | 202-1001 | Day 2 | pre       | 58597   |           |
| Urokinase | Pleural Fluid | A | 50,000  | 202-1001 | Day 2 | post (3h) |         | No sample |
| Urokinase | Pleural Fluid | A | 50,000  | 202-1001 | Day 3 | pre       |         | No sample |
| Urokinase | Pleural Fluid | A | 50,000  | 202-1001 | Day 3 | post (3h) |         | No sample |
| Urokinase | Pleural Fluid | A | 50,000  | 202-1001 | Day4  |           |         | No sample |
| Urokinase | Pleural Fluid | A | 50,000  | 202-1002 | Day1  | pre       | 4337    |           |
| Urokinase | Pleural Fluid | A | 50,000  | 202-1002 | Day1  | post (3h) | 102523  |           |
| Urokinase | Pleural Fluid | A | 50,000  | 202-1002 | Day 2 | pre       | 16131   |           |

|           |               |   |         |          |       |           |          |           |
|-----------|---------------|---|---------|----------|-------|-----------|----------|-----------|
| Urokinase | Pleural Fluid | A | 50,000  | 202-1002 | Day 2 | post (3h) | 14562    |           |
| Urokinase | Pleural Fluid | A | 50,000  | 202-1002 | Day 3 | pre       |          | No sample |
| Urokinase | Pleural Fluid | A | 50,000  | 202-1002 | Day 3 | post (3h) |          | No sample |
| Urokinase | Pleural Fluid | A | 50,000  | 202-1002 | Day4  |           |          | No sample |
| Urokinase | Pleural Fluid | B | 100,000 | 202-1003 | Day1  | pre       | 1388     |           |
| Urokinase | Pleural Fluid | B | 100,000 | 202-1003 | Day1  | post (3h) | 588251   |           |
| Urokinase | Pleural Fluid | B | 100,000 | 202-1003 | Day 2 | pre       |          | No sample |
| Urokinase | Pleural Fluid | B | 100,000 | 202-1003 | Day 2 | post (3h) | 120641   |           |
| Urokinase | Pleural Fluid | B | 100,000 | 202-1003 | Day 3 | pre       |          | No sample |
| Urokinase | Pleural Fluid | B | 100,000 | 202-1003 | Day 3 | post (3h) |          | No sample |
| Urokinase | Pleural Fluid | B | 100,000 | 202-1003 | Day4  |           |          | No sample |
| Urokinase | Pleural Fluid | C | 200,000 | 202-1004 | Day1  | pre       | 14445.36 |           |
| Urokinase | Pleural Fluid | C | 200,000 | 202-1004 | Day1  | post (3h) | 1047424  |           |
| Urokinase | Pleural Fluid | C | 200,000 | 202-1004 | Day 2 | pre       | 69434    |           |
| Urokinase | Pleural Fluid | C | 200,000 | 202-1004 | Day 2 | post (3h) | 3245870  |           |
| Urokinase | Pleural Fluid | C | 200,000 | 202-1004 | Day 3 | pre       | 9479     |           |
| Urokinase | Pleural Fluid | C | 200,000 | 202-1004 | Day 3 | post (3h) | 3616920  |           |
| Urokinase | Pleural Fluid | C | 200,000 | 202-1004 | Day 4 |           | 8438     |           |

|           |               |   |         |          |       |           |         |           |
|-----------|---------------|---|---------|----------|-------|-----------|---------|-----------|
| Urokinase | Pleural Fluid | D | 400,000 | 202-1005 | Day 1 | pre       | 5467    |           |
| Urokinase | Pleural Fluid | D | 400,000 | 202-1005 | Day1  | post (3h) | 811888  |           |
| Urokinase | Pleural Fluid | D | 400,000 | 202-1005 | Day 2 | pre       | 27335   |           |
| Urokinase | Pleural Fluid | D | 400,000 | 202-1005 | Day 2 | post (3h) | 2266940 |           |
| Urokinase | Pleural Fluid | D | 400,000 | 202-1005 | Day 3 | pre       |         | No sample |
| Urokinase | Pleural Fluid | D | 400,000 | 202-1005 | Day 3 | Post (3h) | 4663664 |           |
| Urokinase | Pleural Fluid | D | 400,000 | 202-1005 | Day 4 |           | 53887   |           |
| Urokinase | Pleural Fluid | B | 100,000 | 103-1001 | Day1  | pre       | 1235.21 |           |
| Urokinase | Pleural Fluid | B | 100,000 | 103-1001 | Day1  | post (3h) | 475563  |           |
| Urokinase | Pleural Fluid | B | 100,000 | 103-1001 | Day 2 | pre       | 9689    |           |
| Urokinase | Pleural Fluid | B | 100,000 | 103-1001 | Day 2 | post (3h) | 201680  |           |
| Urokinase | Pleural Fluid | B | 100,000 | 103-1001 | Day 3 | pre       |         | No sample |
| Urokinase | Pleural Fluid | B | 100,000 | 103-1001 | Day 3 | post (3h) |         | No sample |
| Urokinase | Pleural Fluid | B | 100,000 | 103-1001 | Day4  |           |         | No sample |
| Urokinase | Pleural Fluid | E | 800,000 | 103-1002 | Day1  | pre       | 3690    |           |
| Urokinase | Pleural Fluid | E | 800,000 | 103-1002 | Day1  | post (3h) | 2811760 |           |
| Urokinase | Pleural Fluid | E | 800,000 | 103-1002 | Day 2 | pre       | 13795   |           |
| Urokinase | Pleural Fluid | E | 800,000 | 103-1002 | Day 2 | post (3h) | 8720920 |           |

|           |               |   |         |          |       |           |  |           |
|-----------|---------------|---|---------|----------|-------|-----------|--|-----------|
| Urokinase | Pleural Fluid | E | 800,000 | 103-1002 | Day 3 | pre       |  | No sample |
| Urokinase | Pleural Fluid | E | 800,000 | 103-1002 | Day 3 | post (3h) |  | No sample |
| Urokinase | Pleural Fluid | E | 800,000 | 103-1002 | Day4  |           |  | No sample |



Figure S6.

A.

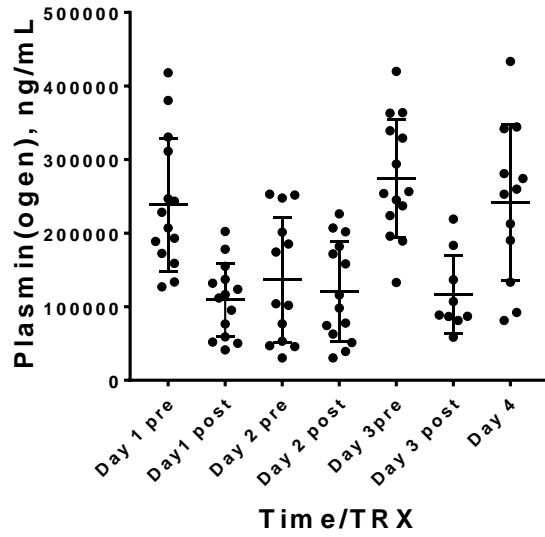

B.

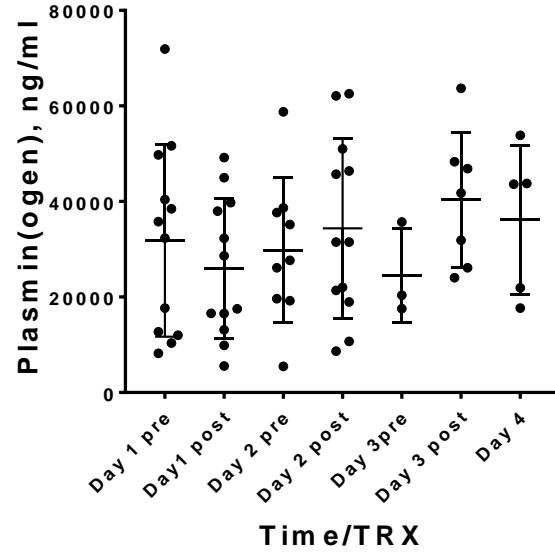

**Legend.** Plasma (A) and PF total plasminogen levels were measured by ELISA (R&D Systems, MN). Data are presented as dot plots with horizontal lines indicating the medians and whiskers representing interquartile range. While levels of PF plasminogen were at least there were no significant differences in the plasminogen levels in either plasma or PF at any of the tested intervals.

Figure S7. Trended PF uPA and PAI-1 values and Clinical Outcomes in Selected Patients.

A.

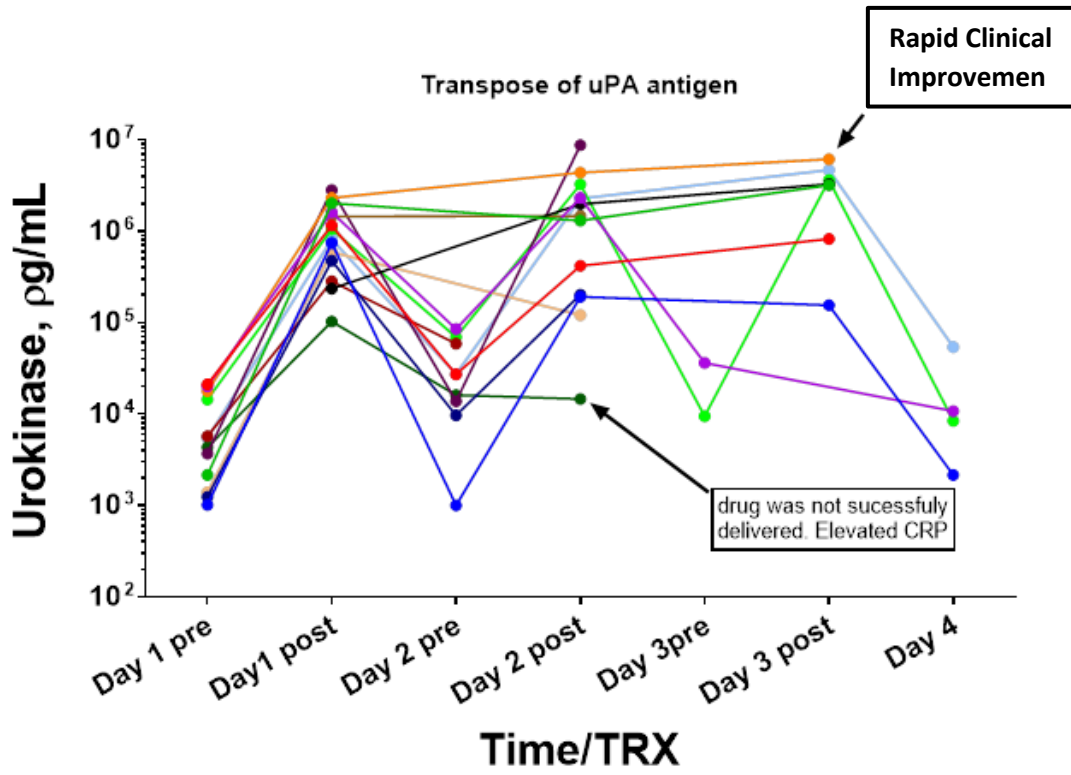

B.

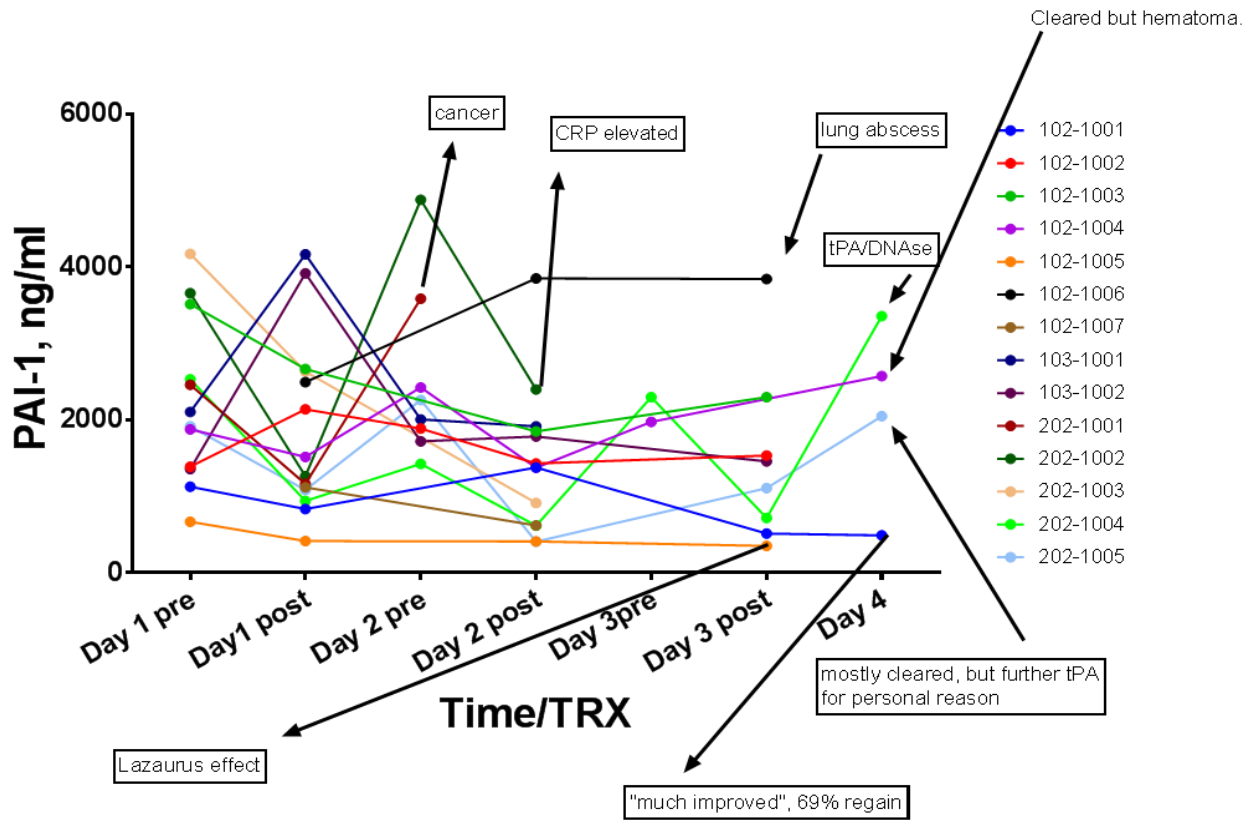

**Legend.** A. PF uPA antigen concentrations plotted as line plots for all subjects (n=14). Pre-: within 3h pre-dosing of LTI-01 IPFT. Pos-t: within 3h of administration of the dose of LTI-01 IPFT. B. PAI-1 antigen concentrations in PF at the same intervals pre- and post-dosing of LTI-01 IPFT. Clinical Outcomes are indicated for selected patients and as described text.
